# Supplementary material for: Solid-state dye-sensitized solar cells fabricated by coupling photoelectrochemically deposited poly(3,4-ethylenedioxythiophene) (PEDOT) with silver-paint on cathode
Source: Royal Society of Chemistry journal article supplement (doi:10.1039/c0cc04841k), 2011-01-01
Supplement: c0cc04841k.pdf [file c0cc04841k.pdf]

Supplementary Information

**Solid-state dye-sensitized solar cells fabricated by coupling photoelectrochemically deposited poly(3,4-ethylenedioxythiophene) (PEDOT) with silver-paint on cathode**

**Kazuhiro Manseki\* , Wirat Jarernboon , You Youhai, Ke-Jian Jiang, Kazuharu Suzuki, Naruhiko Masaki, Yukyeong Kim, Jiangbin Xia, and Shozo Yanagida\*<sup>a</sup>**

<sup>a</sup>Center for Advanced Science and Innovation, Osaka University,  
Yamadaoka 2-1, Suita, Osaka, Japan;  
Fax: +81-6-6879-4132; Tel: +81-6-6879-4132;  
E-mail: [kmanseki@gifu-u.ac.jp](mailto:kmanseki@gifu-u.ac.jp), [s.yanagida@casi.osaka-u.ac.jp](mailto:s.yanagida@casi.osaka-u.ac.jp)

† *A typical cell fabrication is employed as follows:* a transparent conducting substrate, FTO (F doped SnO<sub>2</sub> coated on soda-lime glass, sheet resistance 13 Ω/□, Nippon Sheet Glass) is used for an anode electrode. A dense TiO<sub>2</sub> blocking layer with around 80 nm in thickness is then deposited by spin-coating in order to avoid a short circuit between FTO substrate and hole conducting materials. Mesoporous TiO<sub>2</sub> layer with various thickness are prepared from colloidal paste of TiO<sub>2</sub> (Nanoxide-T: Solaronix) by doctor blade technique on the FTO covered with the compact TiO<sub>2</sub> layer. Substrates thus obtained are sintered at 500 °C for 15 min. The film thickness is measured by a profiler (Sloam, Dektak3). After calcination, TiO<sub>2</sub> electrodes are immersed into 3.0×10<sup>-4</sup> M cis-Ru(dhtbpy)(dcbpy)(NCS)<sub>2</sub>, dhtbpy = 4,4'-di(hexylthienylvinyl)-2,2'-bipyridyl; dcbpy = 4,4'-dicarboxy-2,2'-bipyridyl, which is known as HRS-1, of acetonitrile/tert-butanol (1:1, (v/v)) and kept in a dark for 24 h at 60 °C. In-situ photoelectrochemical oxidative polymerization is carried out in a mixed solution of 0.01 M 2,2'-bis(3,4-ethylene-dioxythiophene) (bis-EDOT, Azuma) and 0.1 M lithium bis(trifluoromethane-sulfonyl) imide (LiTFSI, Fluka) in acetonitrile by applying constant potential (+0.2V vs Ag/AgCl) using the dyed TiO<sub>2</sub> electrode dipped in the solution. The reaction is monitored by electrochemical system (BAS 100B/W) for 20 min under irradiation of a 500W xenon lamp (22 mW/cm<sup>2</sup>, λ > 520 nm). After the polymerization, TiO<sub>2</sub> electrodes are rinsed with acetonitrile and dried at room temperature, then treated with the ionic liquid of 0.2 M LiTFSI mixed with 0.2 M tBP(4-tert-butylpyridine) in 1-ethyl-3-methylimidazolium bis(trifluoromethane-sulfonyl)imide (EMIm-TFSI), and kept in a dark for 12 h. Then the ionic liquid on the electrode surface is wiped off and silver paste (D-362, σ~1.4×10<sup>5</sup> S m<sup>-1</sup>, Fujikura Kasei) or carbon paste (XC-223, σ~3.3×10<sup>3</sup> S m<sup>-1</sup>, Fujikura Kasei) is applied directly onto the wiped electrode. Typical active area of electrode is 0.25 cm<sup>2</sup> (5mm square) and solar cell performance is measured with a mask under AM 1.5 (100 mW cm<sup>-2</sup>) irradiation conditions (YSS-80, Yamashita Denso) at room temperature, and incident photon to current conversion efficiency (IPCE) is evaluated using a commercial setup for IPCE measurements system

**(PV-25 DYE, JASCO) under 5 mW cm<sup>-2</sup> monochromic light illumination. Electrochemical impedance spectroscopy (EIS) is measured by an impedance analyzer (1260, Solartron analytical) connected with a potentiostat (1287, Solartron analytical) under illuminated condition (AM 1.5, 100 mW cm<sup>-2</sup>) at 25 °C. EIS is recorded over a frequency range of 1 Hz – 200 kHz.**
